# Supplementary material for: Does gradually returning to work improve time to sustainable work after a work-acquired musculoskeletal disorder in British Columbia, Canada? A matched cohort effectiveness study
Source: HighWire-hosted journal article supplement (doi:10.1136/oemed-2020-107014), 2021-03-18
Supplement: oemed-2020-107014supp001_data_supplement.pdf [file oemed-2020-107014supp001_data_supplement.pdf]

## APPENDIX 1. DATABASES

*WorkSafeBC files* - The WSBC's claims database included a claim file, employer file, average earnings decision file, firm level data file, and return-to-work file.

The claim file was used to obtain information on injury (date, International Classification of Diseases, ninth revision (ICD-9) codes, body part type, and nature of injury), claim registration dates, and on demographic, wage, occupation, industry and employer variables.

The average earnings decision file was used to obtain information on the worker's pre-injury annual earnings and shift schedule.

The return-to-work file includes calendar data with detailed information on return to work events and outcomes (40).

The following files were obtained from the Ministry of Health:

*Medical Registry file* – This data includes all individuals who received and/or were registered to receive services in BC. We used this file to exclude workers who were not registered to MSP one year before and one year after injury, and therefore would have incomplete billing records for medical services for our study period (19).

*Medical Services Plan (MSP) file* – contains billing records for medical services by fee-for-service practitioners for individuals covered by MSP (20).

*Hospital discharge abstract file* – contains data on hospital discharges, transfers and deaths of in-patients, and day surgery patients from acute care hospitals in BC (21).

*PharmaNet file* – includes data on dispensed medications and medical supplies.

We used the MSP, Hospital discharge abstract data and PharmaNet data to exclude pregnant workers, estimate the healthcare utilization in the year before and after claim and the pre-claim comorbidities of the injured workers (22).

**Pregnancy:** Workers were excluded if they had a pregnancy in the year before claim, with either and MSP or a hospital related pregnancy diagnosis or procedure code

**Healthcare utilization:** We measured healthcare utilization one year before injury, 30 days after injury, and one year after injury. We measured General Practitioner visits, Specialist visits, Diagnostic Procedure visits, Therapeutic procedures, other services, and Hospitalizations.

**Comorbidities:** Comorbidities were included if they comorbidity was the first diagnosis in a year before injury, or a second diagnosis or medication use in year before or year after diagnosis in year before injury. Based on the BC Chronic Disease and Selected Procedure Case Definitions (<https://www2.gov.bc.ca/assets/gov/health/conducting-health-research/data-access/chronic-disease-registries-case-definitions.pdf>), we included the following diseases (with ICD-9 and ICD-10 codes in the comorbidity measure:

|                                     | ICD9                         | ICD10                                                                     |
|-------------------------------------|------------------------------|---------------------------------------------------------------------------|
| <b>Ischemic Heart Disease</b>       | 410, 411, 412, 413, 414, 428 | I21, I20, I50, I22, I23, I24, I25                                         |
| <b>Chronic Respiratory Disease</b>  | 491, 492, 493, 496           | J45, J41, J42, J43, J44                                                   |
| <b>Mental Disorders</b>             | 296, 300, 311                | F30, F31, F32, F33, F34, F38, F39, F40, F41, F42, F43, F44, F45, F48, F68 |
| <b>Diabetes</b>                     | 250                          | E10, E11, E13, E14                                                        |
| <b>Arthritis</b>                    | 714, 715                     | M15, M16, M17, M18, M19                                                   |
| <b>Cancer (Malignant neoplasms)</b> | 140-209                      | C                                                                         |
| <b>Chronic Bowel Disease</b>        | 555, 556                     | K50, K51                                                                  |
| <b>Migraine</b>                     | 346                          | G43                                                                       |
| <b>Stroke</b>                       |                              | I60, I61, I64, H341                                                       |

**Appendix 2. Remaining descriptive statistics of workers with an accepted MSD lost time claim between 2010 and 2015, by GRTW status, in the Canadian jurisdiction of British Columbia**

|                                                     | FULL DISABILITY FOR 30 DAYS<br>UNMATCHED COHORT |            |                       | FULL DISABILITY FOR 30 DAYS<br>MATCHED COHORT |            |                       |
|-----------------------------------------------------|-------------------------------------------------|------------|-----------------------|-----------------------------------------------|------------|-----------------------|
| WORKERS (FIRST CLAIM 2010-2015)                     | Total workers                                   |            | Workers with<br>GRTW  | Total workers                                 |            | Workers with<br>GRTW  |
|                                                     | N = 37,356                                      |            | N = 17,468<br>(46,8%) | N = 24,988                                    |            | N = 12,494<br>(50,0%) |
|                                                     | N                                               | (Column %) | (Row %)               | N                                             | (Column %) | (Row %)               |
| <b>Injury and socio-demographic characteristics</b> |                                                 |            |                       |                                               |            |                       |
| <b>Musculoskeletal disorder</b>                     |                                                 |            |                       |                                               |            |                       |
| Upper Extremity Sprains & Strains                   | 6 515                                           | 17.4       | 50.5                  | 4423                                          | 17.7       | 52.1                  |
| Lower Extremity Sprains & Strains                   | 5 240                                           | 14.0       | 44.4                  | 3504                                          | 14.0       | 47.6                  |
| Back <sup>a</sup> Sprains & Strains                 | 12 546                                          | 33.6       | 46.7                  | 8360                                          | 33.5       | 48.0                  |
| Upper Extremity Fractures                           | 3 798                                           | 10.3       | 45.3                  | 2521                                          | 10.1       | 52.2                  |
| Lower Extremity Fractures                           | 3 027                                           | 8.1        | 48.0                  | 1996                                          | 7.9        | 55.1                  |
| Torso <sup>b</sup> Fractures                        | 1 437                                           | 3.9        | 39.6                  | 929                                           | 3.7        | 49.5                  |
| Dislocation                                         | 951                                             | 2.6        | 42.6                  | 624                                           | 2.5        | 48.9                  |
| Dorsopathies                                        | 1 821                                           | 4.9        | 47.1                  | 1223                                          | 4.9        | 51.7                  |
| Rheumatism (excluding the back)                     | 2 021                                           | 5.4        | 48.9                  | 1408                                          | 5.6        | 49.6                  |
| <b>Prior claims in last 10 years</b>                |                                                 |            |                       |                                               |            |                       |
| No                                                  | 15 363                                          | 41.1       | 44.9                  | 10214                                         | 40.9       | 48.4                  |
| Yes                                                 | 21 933                                          | 59.9       | 42.6                  | 14774                                         | 59.1       | 51.1                  |
| <b>Healthcare utilization characteristics</b>       |                                                 |            |                       |                                               |            |                       |
| <b>Comorbidities</b>                                |                                                 |            |                       |                                               |            |                       |
| Yes                                                 | 28 995                                          | 77.6       | 46.6                  | 19405                                         | 77.7       | 50.3                  |
| No                                                  | 8 361                                           | 22.4       | 47.4                  | 5583                                          | 22.3       | 48.9                  |
| <b>Opioid use 30 days post claim</b>                |                                                 |            |                       |                                               |            |                       |
| No                                                  | 21 889                                          | 58.6       | 46.5                  | 14710                                         | 58.9       | 48.3                  |
| Yes                                                 | 15 467                                          | 41.4       | 47.1                  | 10278                                         | 41.1       | 52.4                  |
| <b>NSAIDS use 30 days post claim</b>                |                                                 |            |                       |                                               |            |                       |
| No                                                  | 23 175                                          | 62.0       | 45.6                  | 15536                                         | 62.2       | 49.0                  |
| Yes                                                 | 14 181                                          | 37.9       | 48.6                  | 9452                                          | 37.8       | 51.7                  |
| <b>SMR use 30 days post claim</b>                   |                                                 |            |                       |                                               |            |                       |
| No                                                  | 30 759                                          | 82.3       | 46.4                  | 20573                                         | 82.3       | 50.0                  |
| Yes                                                 | 6 597                                           | 17.7       | 48.2                  | 4415                                          | 17.7       | 50.0                  |
| <b>Days supply for opioids 30 days post claim</b>   |                                                 |            |                       |                                               |            |                       |
| 0                                                   | 21 889                                          | 58.6       | 46.5                  | 14 710                                        | 58.9       | 48.3                  |
| 1-14 days                                           | 9 992                                           | 26.8       | 48.4                  | 6 666                                         | 26.7       | 53.3                  |
| => 15                                               | 5 475                                           | 14.7       | 44.9                  | 3 612                                         | 14.4       | 50.7                  |
| <b>Days supply for NSAIDS 30 days post claim</b>    |                                                 |            |                       |                                               |            |                       |
| 0                                                   | 23 175                                          | 62.0       | 45.6                  | 15 536                                        | 62.2       | 49.0                  |
| 1-14 days                                           | 5 107                                           | 13.7       | 46.9                  | 3 351                                         | 13.4       | 50.6                  |
| => 15                                               | 9 074                                           | 24.3       | 49.6                  | 6 101                                         | 24.4       | 52.2                  |
| <b>Days supply for SMR 30 days post claim</b>       |                                                 |            |                       |                                               |            |                       |
| 0                                                   | 30 759                                          | 82.3       | 46.4                  | 20 573                                        | 82.3       | 50.0                  |
| 1-14 days                                           | 2 992                                           | 8.0        | 45.2                  | 2 021                                         | 8.1        | 47.1                  |

|                                                  |        |      |      |        |      |      |
|--------------------------------------------------|--------|------|------|--------|------|------|
| => 15                                            | 3 605  | 9.7  | 50.7 | 2 394  | 9.6  | 52.4 |
| <b>GP visits 30 days post claim</b>              |        |      |      |        |      |      |
| 0                                                | 36 129 | 96.7 | 46.8 | 24 191 | 96.8 | 50.0 |
| 1                                                | 1 122  | 3.0  | 46.2 | 731    | 2.9  | 49.5 |
| 2                                                | 86     | 0.2  | 43.0 | 50     | 0.2  | 46.0 |
| >2                                               | 19     | 0.1  | 57.9 | 16     | 0.1  | 62.5 |
| <b>Specialist visits 30 days post claim</b>      |        |      |      |        |      |      |
| 0                                                | 30 075 | 80.5 | 46.4 | 20 092 | 80.4 | 49.3 |
| 1                                                | 4 462  | 11.9 | 48.1 | 2987   | 11.9 | 52.1 |
| 2                                                | 1 736  | 4.7  | 49.9 | 1160   | 4.6  | 55.8 |
| >2                                               | 1 083  | 2.9  | 45.5 | 749    | 3.0  | 52.3 |
| <b>Diagnostic procedures 30 days post claim</b>  |        |      |      |        |      |      |
| 0                                                | 20 498 | 54.9 | 46.5 | 13 734 | 54.9 | 49.4 |
| 1                                                | 11 958 | 32.0 | 46.7 | 8 009  | 32.1 | 50.2 |
| 2                                                | 3 548  | 9.5  | 47.9 | 2 325  | 9.3  | 52.6 |
| >2                                               | 1 352  | 3.6  | 47.9 | 920    | 3.7  | 51.3 |
| <b>Therapeutic procedures 30 days post claim</b> |        |      |      |        |      |      |
| 0                                                | 30 552 | 81.8 | 46.5 | 20 419 | 81.7 | 49.1 |
| 1                                                | 4 238  | 11.3 | 47.8 | 2 875  | 11.5 | 52.8 |
| 2                                                | 1 544  | 4.1  | 50.1 | 1 001  | 4.0  | 57.1 |
| >2                                               | 1 022  | 2.7  | 45.8 | 693    | 2.8  | 55.4 |
| <b>Other services 30 days post claim</b>         |        |      |      |        |      |      |
| 0                                                | 1 797  | 4.8  | 42.1 | 1 175  | 4.7  | 47.6 |
| 1                                                | 3 177  | 8.5  | 39.2 | 2 060  | 8.2  | 44.1 |
| 2                                                | 6 612  | 17.7 | 42.0 | 4 388  | 17.6 | 46.5 |
| >2                                               | 25 770 | 68.9 | 49.2 | 17 365 | 69.5 | 51.7 |

<sup>a</sup>Back, head, neck, spine and torso; <sup>b</sup>Torso, back, neck, spine and head; <sup>c</sup>Business, finance and administration; <sup>d</sup>Natural and applied sciences, related occupations; <sup>e</sup>Social science, education, government, service and religion; <sup>f</sup>Recreation, arts, culture and sport;

### Appendix 3. Likelihood of being offered GRTW for workers with an accepted MSD lost time claim between 2010 and 2015 in British Columbia

| Workers (first claim 2010-2015)                     |      |           |
|-----------------------------------------------------|------|-----------|
| <u>Injury and socio-demographic characteristics</u> |      |           |
|                                                     | OR   | 95% CI    |
| <b>Musculoskeletal disorder</b>                     |      |           |
| Upper Extremity Sprains & Strains                   | Ref  |           |
| Lower Extremity Sprains & Strains                   | 0.89 | 0.82-0.96 |
| Back <sup>a</sup> Sprains & Strains                 | 0.85 | 0.80-0.91 |
| Upper Extremity Fractures                           | 0.88 | 0.80-0.97 |
| Lower Extremity Fractures                           | 1.01 | 0.92-1.12 |
| Torso <sup>b</sup> Fractures                        | 0.84 | 0.74-0.96 |
| Dislocation                                         | 0.90 | 0.77-1.04 |
| Dorsopathies                                        | 0.95 | 0.85-1.06 |
| Rheumatism (excluding the back)                     | 0.96 | 0.86-1.07 |
| <b>Gender</b>                                       |      |           |
| Man                                                 | Ref  |           |
| Woman                                               | 0.65 | 0.61-0.69 |
| <b>Age (in years)</b>                               |      |           |
| 15-24                                               | Ref  |           |
| 25-34                                               | 1.35 | 1.23-1.49 |
| 35-44                                               | 1.44 | 1.31-1.59 |
| 45-54                                               | 1.44 | 1.32-1.59 |
| 55-64                                               | 1.47 | 1.33-1.62 |
| <b>Annual wage (CAD\$)</b>                          |      |           |
| <\$20.000                                           | Ref  |           |
| \$20.000-\$39.999                                   | 1.37 | 1.26-1.48 |
| \$40.000-\$59.999                                   | 1.76 | 1.61-1.92 |
| >\$59.999                                           | 1.72 | 1.56-1.89 |
| <b>Prior claims in last 10 years</b>                |      |           |
| No                                                  | Ref  |           |
| Yes                                                 | 1.10 | 1.05-1.15 |
| <u>Healthcare utilization characteristics</u>       |      |           |
| <b>Heart disease comorbidity</b>                    |      |           |
| No                                                  | Ref  |           |
| Yes                                                 | 0.88 | 0.73-1.07 |
| <b>Chronic respiratory comorbidity</b>              |      |           |
| No                                                  | Ref  |           |
| Yes                                                 | 0.97 | 0.86-1.10 |
| <b>Mental health comorbidity</b>                    |      |           |
| No                                                  | Ref  |           |
| Yes                                                 | 0.89 | 0.84-0.95 |
| <b>Diabetes comorbidity</b>                         |      |           |
| No                                                  | Ref  |           |
| Yes                                                 | 1.03 | 0.93-1.13 |
| <b>Arthritis comorbidity</b>                        |      |           |
| No                                                  | Ref  |           |
| Yes                                                 | 0.91 | 0.79-1.05 |
|                                                     |      |           |
| <b>Opioid use year pre claim</b>                    |      |           |

|                                                          |         |           |
|----------------------------------------------------------|---------|-----------|
| No                                                       | Ref     |           |
| Yes                                                      | 0.69    | 0.63-0.75 |
| <b>Opioid use 30 days <u>post</u> claim</b>              |         |           |
| No                                                       | Ref     |           |
| Yes                                                      | 1.08    | 1.01-1.16 |
| <b>NSAIDS use year <u>pre</u> claim</b>                  |         |           |
| No                                                       | Ref     |           |
| Yes                                                      | 0.99    | 0.88-1.09 |
| <b>NSAIDS use 30 days <u>post</u> claim</b>              |         |           |
| No                                                       | Ref     |           |
| Yes                                                      | 1.1     | 1.04-1.17 |
| <b>SMR use year <u>pre</u> claim</b>                     |         |           |
| No                                                       | Ref     |           |
| Yes                                                      | 0.98    | 0.88-1.09 |
| <b>SMR use 30 days <u>post</u> claim</b>                 |         |           |
| No                                                       | Ref     |           |
| Yes                                                      | 1.13    | 1.04-1.22 |
| <b>Days supply for opioids <u>pre</u> claim</b>          |         |           |
| 0                                                        | Ref     |           |
| 1-14 days                                                | 1.33    | 1.20-1.47 |
| => 15                                                    | omitted |           |
| <b>Days supply for opioids 30 days <u>post</u> claim</b> |         |           |
| 0                                                        | Ref     |           |
| 1-14 days                                                | 1.04    | 0.97-1.12 |
| => 15                                                    | omitted |           |
| <b>Days supply for NSAIDS <u>pre</u> claim</b>           |         |           |
| 0                                                        | Ref     |           |
| 1-14 days                                                | 1       | 0.90-1.10 |
| => 15                                                    | omitted |           |
| <b>Days supply for NSAIDS 30 days <u>post</u> claim</b>  |         |           |
| 0                                                        | Ref     |           |
| 1-14 days                                                | 0.97    | 0.90-1.04 |
| => 15                                                    | omitted |           |
| <b>GP visits year <u>pre</u> claim</b>                   |         |           |
| 0                                                        | Ref     |           |
| 1                                                        | 1       | 0.94-1.08 |
| 2                                                        | 0.99    | 0.85-1.16 |
| >2                                                       | 0.99    | 0.77-1.29 |
| <b>GP visits 30 days <u>AFTER</u> claim</b>              |         |           |
| 0                                                        | Ref     |           |
| 1                                                        | 0.93    | 0.81-1.05 |
| 2                                                        | 0.87    | 0.55-1.38 |
| >2                                                       | 1.43    | 0.55-3.72 |
| <b>Specialist visits year <u>BEFORE</u> claim</b>        |         |           |
| 0                                                        | Ref     |           |
| 1                                                        | 1.05    | 0.98-1.12 |
| 2                                                        | 1.05    | 0.96-1.14 |
| >2                                                       | 0.99    | 0.92-1.09 |
| <b>Specialist visits 30 days <u>AFTER</u> claim</b>      |         |           |
| 0                                                        | Ref     |           |
| 1                                                        | 1.05    | 0.97-1.12 |
| 2                                                        | 1.13    | 1.01-1.27 |

|                                                         |      |           |
|---------------------------------------------------------|------|-----------|
| >2                                                      | 1.02 | 0.88-1.17 |
| <b>Diagnostic procedures year BEFORE claim</b>          |      |           |
| 0                                                       | Ref  |           |
| 1                                                       | 1.07 | 1.00-1.14 |
| 2                                                       | 1.04 | 0.96-1.11 |
| >2                                                      | 1.07 | 1.00-1.14 |
| <b>Diagnostic procedures 30 days AFTER claim</b>        |      |           |
| 0                                                       | Ref  |           |
| 1                                                       | 1    | 0.96-1.06 |
| 2                                                       | 1.03 | 0.96-1.11 |
| >2                                                      | 1.02 | 0.89-1.12 |
| <b>Therapeutic procedures year BEFORE claim</b>         |      |           |
| 0                                                       | Ref  |           |
| 1                                                       | 1.01 | 0.96-1.08 |
| 2                                                       | 1.07 | 0.96-1.17 |
| >2                                                      | 0.98 | 0.88-1.10 |
| <b>Therapeutic procedures 30 days AFTER claim</b>       |      |           |
| 0                                                       | Ref  |           |
| 1                                                       | 1.08 | 1.00-1.17 |
| 2                                                       | 1.27 | 1.13-1.44 |
| >2                                                      | 1.22 | 1.05-1.42 |
| <b>Other services year BEFORE claim</b>                 |      |           |
| 0                                                       | Ref  |           |
| 1                                                       | 0.97 | 0.91-1.04 |
| 2                                                       | 0.87 | 0.55-1.38 |
| >2                                                      | 1.44 | 0.55-3.72 |
| <b>Other services 30 days AFTER claim</b>               |      |           |
| 0                                                       | Ref  |           |
| 1                                                       | 1.05 | 0.97-1.13 |
| 2                                                       | 1.13 | 1.01-1.27 |
| >2                                                      | 1.02 | 0.88-1.17 |
| <b>Hospitalizations year BEFORE claim (max 25)</b>      |      |           |
| 0                                                       | Ref  |           |
| 1                                                       | 0.99 | 0.90-1.08 |
| 2                                                       | 1.06 | 0.86-1.32 |
| >2                                                      | 1.33 | 0.91-1.94 |
| <b>Hospitalizations 30 days AFTER claim (max 27)</b>    |      |           |
| 0                                                       | Ref  |           |
| 1                                                       | 0.96 | 0.90-1.02 |
| 2                                                       | 1.02 | 0.90-1.15 |
| >2                                                      | 0.8  | 0.64-1.00 |
| <b><u>Workplace characteristics</u></b>                 |      |           |
| <b>Occupation<sup>a</sup></b>                           |      |           |
| Trades, transport and equipment operations <sup>g</sup> | Ref  |           |
| Business, finance and administration <sup>e</sup>       | 0.26 | 1.11-1.44 |
| Natural and applied sciences <sup>d</sup>               | 1.07 | 0.91-1.27 |
| Health                                                  | 1.09 | 0.97-1.21 |
| Education, law, and social services <sup>e</sup>        | 0.81 | 0.71-0.92 |
| Art, Culture, recreation and sports <sup>f</sup>        | 0.66 | 0.53-0.82 |
| Sales, service                                          | 1.22 | 1.12-1.32 |
| Management                                              | 1.39 | 1.19-1.61 |

|                                                         |      |           |
|---------------------------------------------------------|------|-----------|
| Natural resources, agriculture                          | 0.9  | 0.79-1.03 |
| Manufacturing and utilities <sup>h</sup>                | 1.11 | 1.00-1.23 |
| <b>Industry<sup>a</sup></b>                             |      |           |
| Primary resources                                       | 0.54 | 0.47-0.62 |
| Manufacturing                                           | 1.35 | 1.22-1.49 |
| Construction                                            | 0.88 | 0.81-0.95 |
| Transportation <sup>j</sup>                             | 0.74 | 0.68-0.81 |
| Trade                                                   | 1.55 | 1.43-1.68 |
| Public sector                                           | 1.14 | 1.00-1.28 |
| Service sector                                          | Ref  |           |
| <b>Firm size (FTE)</b>                                  |      |           |
| <20                                                     | Ref  |           |
| 21-100                                                  | 1.35 | 1.27-1.43 |
| 101-500                                                 | 1.88 | 1.76-2.00 |
| 501-1000                                                | 1.94 | 1.74-2.16 |
| >1000                                                   | 2.04 | 1.89-2.20 |
| <b>Claim year</b>                                       |      |           |
| 2010                                                    | Ref  |           |
| 2011                                                    | 0.99 | 0.92-1.07 |
| 2012                                                    | 1.18 | 1.10-1.27 |
| 2013                                                    | 1.28 | 1.18-1.37 |
| 2014                                                    | 1.49 | 1.38-1.61 |
| 2015                                                    | 1.67 | 1.54-1.80 |
| <b>Occupation<sup>a</sup></b>                           |      |           |
| Trades, transport and equipment operations <sup>g</sup> | Ref  |           |
| Business, finance and administration <sup>c</sup>       | 0.26 | 1.11-1.44 |
| Natural and applied sciences <sup>d</sup>               | 1.07 | 0.91-1.27 |
| Health                                                  | 1.09 | 0.97-1.21 |
| Education, law, and social services <sup>e</sup>        | 0.81 | 0.71-0.92 |
| Art, Culture, recreation and sports <sup>f</sup>        | 0.66 | 0.53-0.82 |

<sup>a</sup>Back, head, neck, spine and torso; <sup>b</sup>Torso, back, neck, spine and head; <sup>c</sup>Business, finance and administration; <sup>d</sup>Natural and applied sciences, related occupations; <sup>e</sup>Social science, education, government, service and religion; <sup>f</sup>Recreation, arts, culture and sport; <sup>g</sup>Trades, transport, equipment operators and related occupations; <sup>h</sup>Manufacturing, processing and utilities; <sup>j</sup>Transportation and warehousing

**APPENDIX 4. Adjusted quantile regression for differences in time-loss days until full sustainable RTW 1 year after the first time-loss day, BY MSD<sup>a</sup>. The regression coefficients represent the difference in days relative to the number of days for the workers without GRTW by 10 percentiles of the distribution.**

|             | UPPER SPRAINS                                                         |                                                                                | LOWER SPRAINS                                                         |                                                                                | LOWER FRACTURES                                                       |                                                                                | TORSO FRACTURES                                                       |                                                                                |
|-------------|-----------------------------------------------------------------------|--------------------------------------------------------------------------------|-----------------------------------------------------------------------|--------------------------------------------------------------------------------|-----------------------------------------------------------------------|--------------------------------------------------------------------------------|-----------------------------------------------------------------------|--------------------------------------------------------------------------------|
|             | Calendar days off work for workers without GRTW (95% CI) <sup>b</sup> | Coefficient (additional calendar days off work for workers with GRTW) (95% CI) | Calendar days off work for workers without GRTW (95% CI) <sup>b</sup> | Coefficient (additional calendar days off work for workers with GRTW) (95% CI) | Calendar days off work for workers without GRTW (95% CI) <sup>b</sup> | Coefficient (additional calendar days off work for workers with GRTW) (95% CI) | Calendar days off work for workers without GRTW (95% CI) <sup>b</sup> | Coefficient (additional calendar days off work for workers with GRTW) (95% CI) |
| <b>10th</b> | 44.56 (42.65; 46.46)                                                  | 23.92 (21.30; 26.54)                                                           | 42.96 (40.91; 45.01)                                                  | 22.05 (19.11; 24.99)                                                           | 46.47 (43.52; 49.42)                                                  | 31.4 (27.49; 35.31)                                                            | 40.42 (36.37; 44.48)                                                  | 28.95 (23.24; 34.65)                                                           |
| <b>20th</b> | 59.02 (56.26; 61.79)                                                  | 26.44 (22.64; 30.24)                                                           | 55.87 (52.89; 58.85)                                                  | 28.18 (23.9; 32.45)                                                            | 57.88 (54.16; 61.60)                                                  | 42.24 (36.56; 47.92)                                                           | 48.67 (42.78; 54.56)                                                  | 41.12 (32.84; 49.10)                                                           |
| <b>30th</b> | 76.47 (72.72; 80.22)                                                  | 31.22 (26.06; 36.38)                                                           | 72.30 (68.25; 76.35)                                                  | 33.94 (28.15; 39.74)                                                           | 73.64 (67.83; 79.45)                                                  | 51.48 (43.76; 59.19)                                                           | 58.63 (50.63; 66.62)                                                  | 56.94 (45.70; 68.18)                                                           |
| <b>40th</b> | 100.15 (94.86; 105.44)                                                | 35.92 (28.65; 42.30)                                                           | 96.01 (90.30; 101.71)                                                 | 39.95 (31.78; 48.13)                                                           | 94.15 (85.96; 102.34)                                                 | 53.16 (42.29; 64.03)                                                           | 69.87 (58.60; 81.14)                                                  | 72.31 (56.46; 88.16)                                                           |
| <b>50th</b> | 140.65 (132.53; 148.78)                                               | 36.46 (25.28; 47.63)                                                           | 130.32 (121.56; 139.09)                                               | 42.59 (30.03; 55.15)                                                           | 119.29 (106.70; 131.87)                                               | 57.17 (40.46; 73.88)                                                           | 95.00 (77.68; 112.32)                                                 | 83.33 (58.98; 107.69)                                                          |
| <b>60th</b> | 205.33 (190.59; 220.08)                                               | 30.37 (10.08; 50.66)                                                           | 190.59 (174.68; 206.50)                                               | 33.1 (10.3; 55.89)                                                             | 158.50 (135.65; 181.35)                                               | 50.16 (19.83; 80.49)                                                           | 156.77 (125.33; 188.21)                                               | 57.24 (13.02; 101.46)                                                          |
| <b>70th</b> | 304.04 (284.24; 323.83)                                               | 10.97 (-16.27; 38.22)                                                          | 293.66 (272.30; 315.02)                                               | 1.8 (-28.81; 32.40)                                                            | 240.61 (209.93; 271.29)                                               | 34.7 (-6.01; 75.41)                                                            | 279.83 (237.63; 622.04)                                               | 9.75 (-49.60; 69.10)                                                           |
| <b>80th</b> | 348.79 (344.99; 352.59)                                               | 0 (-5.22; 5.22)                                                                | 348.79 (344.69; 352.89)                                               | 0 (-5.87; 5.87)                                                                | 348.79 (342.90; 354.67)                                               | 0 (-7.81; 7.81)                                                                | 348.79 (340.69; 356.89)                                               | 0 (-11.39; 11.39)                                                              |
| <b>90th</b> | 365.00 (365.00; 365.00)                                               | 0 (0; 0) <sup>c</sup>                                                          | 365.00 (365.00; 365.00)                                               | 0 (0; 0) <sup>c</sup>                                                          | 365.00 (365.00; 365.00)                                               | 0 (0; 0) <sup>c</sup>                                                          | 365.00 (365.00; 365.00)                                               | 0 (0; 0) <sup>c</sup>                                                          |

|             | DISLOCATION                                                           |                                                                                | DORSOPATHIES                                                          |                                                                                |
|-------------|-----------------------------------------------------------------------|--------------------------------------------------------------------------------|-----------------------------------------------------------------------|--------------------------------------------------------------------------------|
|             | Calendar days off work for workers without GRTW (95% CI) <sup>b</sup> | Coefficient (additional calendar days off work for workers with GRTW) (95% CI) | Calendar days off work for workers without GRTW (95% CI) <sup>b</sup> | Coefficient (additional calendar days off work for workers with GRTW) (95% CI) |
| <b>10th</b> | 55.13 (50.23-60.02)                                                   | 31.86 (24.90; 38.82)                                                           | 47.39 (43.79; 50.98)                                                  | 18.63 (13.66; 23.60)                                                           |
| <b>20th</b> | 74.82 (67.71; 81.92)                                                  | 42.98 (32.87; 53.09)                                                           | 64.07 (58.85; 69.92)                                                  | 18.89 (11.67; 26.11)                                                           |
| <b>30th</b> | 98.31 (88.67; 107.95)                                                 | 61.72 (48.00; 75.44)                                                           | 80.80 (73.72; 87.89)                                                  | 21.62 (11.82; 31.42)                                                           |
| <b>40th</b> | 123.77 (110.18; 137.36)                                               | 80.15 (60.81; 99.49)                                                           | 107.67 (97.68; 117.66)                                                | 16.96 (3.14; 30.77)                                                            |
| <b>50th</b> | 159.22 (138.34; 180.11)                                               | 74.71 (44.98; 104.43)                                                          | 159.07 (143.72; 174.41)                                               | 0.06 (-21.17; 21.29)                                                           |
| <b>60th</b> | 199.24 (161.32; 237.16)                                               | 72.10 (18.14; 126.06)                                                          | 250.39 (222.53; 278.25)                                               | -38.83 (-77.38; -0.29)                                                         |
| <b>70th</b> | 248.84 (197.94; 299.73)                                               | 67.52 (-4.9; 139.95)                                                           | 314.67 (277.27; 352.07)                                               | -18.94 (-70.67; 32.80)                                                         |
| <b>80th</b> | 319.79 (310.02; 329.55)                                               | 29.00 (15.10; 42.90)                                                           | 348.79 (341.61; 355.96)                                               | 0 (-9.92; 9.92)                                                                |
| <b>90th</b> | 365.00 (365.00; 365.00)                                               | 0 (0; 0) <sup>c</sup>                                                          | 365.00 (365.00; 365.00)                                               | 0 (0; 0) <sup>c</sup>                                                          |

<sup>a</sup> Adjusted for: MSD, age, wage, gender, occupation, prior claims, firm size, industry sector, claim year, use of opioids, NSAIDs and SMRs within 30 days post claim.

<sup>b</sup> Adjusted prediction of cumulative time-loss days when all other variables are set at the sample means.

<sup>c</sup> Zero value caused by censoring of the data at 365 days.

**APPENDIX 5. Adjusted quantile regression for differences in time-loss days until full sustainable RTW 1 year after the first time-loss day, by industry sector<sup>a</sup>. The regression coefficients represent the difference in days relative to the number of days for the workers without GRTW by 10 percentiles of the distribution.**

|             | PRIMARY RESOURCES                                                     |                                                                                | TRANSPORTATION                                                        |                                                                                | PUBLIC SECTOR                                                         |                                                                                |
|-------------|-----------------------------------------------------------------------|--------------------------------------------------------------------------------|-----------------------------------------------------------------------|--------------------------------------------------------------------------------|-----------------------------------------------------------------------|--------------------------------------------------------------------------------|
|             | Calendar days off work for workers without GRTW (95% CI) <sup>b</sup> | Coefficient (additional calendar days off work for workers with GRTW) (95% CI) | Calendar days off work for workers without GRTW (95% CI) <sup>b</sup> | Coefficient (additional calendar days off work for workers with GRTW) (95% CI) | Calendar days off work for workers without GRTW (95% CI) <sup>b</sup> | Coefficient (additional calendar days off work for workers with GRTW) (95% CI) |
| <b>10th</b> | 46.62 (41.89; 51.34)                                                  | 25.51 (19.55; 31.48)                                                           | 42.92 (40.37; 45.47)                                                  | 23.07 (19.63; 26.52)                                                           | 40.03 (35.53; 44.53)                                                  | 24.82 (18.60; 31.05)                                                           |
| <b>20th</b> | 61.76 (54.95; 68.57)                                                  | 35.32 (26.73; 43.91)                                                           | 53.46 (49.78; 57.13)                                                  | 29.99 (25.02; 34.96)                                                           | 50.31 (43.82; 56.79)                                                  | 30.93 (21.96; 39.90)                                                           |
| <b>30th</b> | 80.11 (70.80; 89.43)                                                  | 44.31 (32.56; 56.07)                                                           | 65.69 (60.66; 70.72)                                                  | 36.74 (29.94; 43.54)                                                           | 61.03 (52.16; 69.90)                                                  | 40.19 (27.91; 52.46)                                                           |
| <b>40th</b> | 108.80 (95.35; 122.25)                                                | 49.32 (32.35; 66.29)                                                           | 85.10 (77.84; 92.36)                                                  | 42.37 (32.56; 52.19)                                                           | 72.77 (59.95; 85.58)                                                  | 56.81 (39.09; 74.53)                                                           |
| <b>50th</b> | 147.10 (126.42; 167.78)                                               | 69.49 (43.40; 95.57)                                                           | 110.05 (98.88; 121.21)                                                | 45.16 (30.06; 60.25)                                                           | 94.32 (74.63; 114.01)                                                 | 80.13 (52.89; 74.53)                                                           |
| <b>60th</b> | 220.76 (184.33; 257.20)                                               | 47.24 (1.28; 93.21)                                                            | 146.67 (127.00; 166.33)                                               | 54.17 (27.58; 80.76)                                                           | 126.64 (91.95; 161.33)                                                | 137.68 (89.67; 185.68)                                                         |
| <b>70th</b> | 294.92 (239.34; 350.49)                                               | 11.25 (-58.86; 81.37)                                                          | 213.00 (183.00; 242.99)                                               | 60.60 (20.00; 101.13)                                                          | 160.97 (108.05; 213.88)                                               | 171.63 (98.42; 244.84)                                                         |
| <b>80th</b> | 348.79 (341.70; 355.88)                                               | 0 (-8.95; 8.95)                                                                | 348.79 (344.96; 352.62)                                               | 0 (-5.17; 5.17)                                                                | 189.79 (183.04; 196.54)                                               | 159.00 (149.66; 168.34)                                                        |
| <b>90th</b> | 365.00 (365.00; 365.00)                                               | 0 (0; 0) <sup>c</sup>                                                          | 365.00 (365.00; 365.00)                                               | 0 (0; 0) <sup>c</sup>                                                          | 365.00 (365.00; 365.00)                                               | 0 (0; 0) <sup>c</sup>                                                          |

<sup>a</sup> Adjusted for: MSD, age, wage, gender, occupation, prior claims, firm size, industry sector, claim year, use of opioids, NSAIDs and SMRs within 30 days post claim.

<sup>b</sup> Adjusted prediction of cumulative time-loss days when all other variables are set at the sample means.

<sup>c</sup> Zero value caused by censoring of the data at 365 days.

**Appendix 6. Adjusted quantile regression for differences in time-loss days until full sustainable RTW 2 years after the first time-loss day<sup>a</sup>. The regression coefficients represent the difference in days relative to the number of days for the workers without GRTW by 10 percentiles of the distribution.**

| OUTCOME = FULL SUSTAINABLE RTW 2 YEARS AFTER INJURY (N=23,318) |                                                              |                                                                               | OUTCOME = SUSTAINABLE GRTW AND FULL SUSTAINABLE RTW 2 YEARS AFTER INJURY (N=23,318) |                                                 |                                                                               |
|----------------------------------------------------------------|--------------------------------------------------------------|-------------------------------------------------------------------------------|-------------------------------------------------------------------------------------|-------------------------------------------------|-------------------------------------------------------------------------------|
|                                                                | Calendar days off work for workers without GRTW <sup>b</sup> | Coefficient – Additional calendar days off work for workers with GRTW (95%CI) |                                                                                     | Calendar days off work for workers without GRTW | Coefficient – Additional calendar days off work for workers with GRTW (95%CI) |
| 10th                                                           | 46.21 (45.31; 47.11)                                         | 21.50 (20.22; 22.78)                                                          | 10th                                                                                | 45.60 (44.80; 46.40)                            | 9.07 (7.93; 10.20)                                                            |
| 20th                                                           | 62.75 (61.40; 64.09)                                         | 23.45 (21.54; 25.37)                                                          | 20th                                                                                | 61.60 (60.30; 62.90)                            | 10.47 (8.62; 12.32)                                                           |
| 30th                                                           | 83.42 (81.49; 85.35)                                         | 22.98 (20.24; 25.71)                                                          | 30th                                                                                | 81.86; 80.06; 83.67)                            | 7.71 (5.14; 10.27)                                                            |
| 40th                                                           | 112.67 (109.72; 115.62)                                      | 20.01 (15.83; 24.19)                                                          | 40th                                                                                | 109.48 (107.09; 111.87)                         | 1.59 (-1.81; 4.98)                                                            |
| 50th                                                           | 157.02 (151.95; 162.10)                                      | 11.60 (4.41; 18.80)                                                           | 50th                                                                                | 150.70 (146.47; 154.92)                         | -11.59 (-17.58; -5.60)                                                        |
| 60th                                                           | 263.03 (249.60; 276.47)                                      | -22.50 (-41.55; -3.45)                                                        | 60th                                                                                | 244.52 (234.06; 254.98)                         | -62.26 (-77.10; -47.43)                                                       |
| 70th                                                           | 531.20 (511.82; 550.59)                                      | -139.53 (-166.84; -111.87)                                                    | 70th                                                                                | 615.06 (601.77; 628.36)                         | -374.73 (-393.58; -355.88)                                                    |
| 80th                                                           | 680.07 (675.46; 684.68)                                      | 0 (-6.54; 6.54)                                                               | 80th                                                                                | 706.67 (697.65; 715.69)                         | -335 (-347.79; -322.20)                                                       |
| 90th                                                           | 730.00 (730.00; 730.00)                                      | 0 (0; 0) <sup>c</sup>                                                         | 90th                                                                                | 730.00 (730.00; 730.00)                         | 0 (0; 0) <sup>c</sup>                                                         |

<sup>a</sup> Adjusted for: MSD, age, wage, gender, occupation, prior claims, firm size, industry sector, claim year, use of opioids, NSAIDS and SMRs within 30 days post claim.

<sup>b</sup> Adjusted prediction of cumulative time-loss days when all other variables are set at the sample means.

<sup>c</sup> Zero value caused by censoring of the data at 365 days.

**Appendix 7. Adjusted quantile regression for differences in time-loss days until full sustainable RTW 1 year after the first time-loss day, for cohort of workers for employers who offered GRTW at least once between 2010-2015 a. The regression coefficients represent the difference in days relative to the number of days for the workers without GRTW by 10 percentiles of the distribution.**

| OUTCOME = FULL SUSTAINABLE RTW 1 YEAR AFTER INJURY; for cohort of workers for employers who offered GRTW at least once between 2010-2015 (N=19,568) |                                                              |                                                                       |
|-----------------------------------------------------------------------------------------------------------------------------------------------------|--------------------------------------------------------------|-----------------------------------------------------------------------|
|                                                                                                                                                     | Calendar days off work for workers without GRTW <sup>b</sup> | Coefficient (additional calendar days off work for workers with GRTW) |
| 10th                                                                                                                                                | 43.89 (43.07; 44.71)                                         | 21.91 (20.74; 23.08)                                                  |
| 20th                                                                                                                                                | 56.47 (55.25; 57.69)                                         | 25.46 (23.73; 27.19)                                                  |
| 30th                                                                                                                                                | 71.92 (70.29; 73.55)                                         | 27.37 (25.06; 29.69)                                                  |
| 40th                                                                                                                                                | 92.05 (89.72; 94.39)                                         | 27.46 (24.14; 31.78)                                                  |
| 50th                                                                                                                                                | 121.35 (117.86; 124.85)                                      | 27.09 (22.12; 32.05)                                                  |
| 60th                                                                                                                                                | 171.33 (165.24; 177.42)                                      | 21.88 (13.23; 30.53)                                                  |
| 70th                                                                                                                                                | 262.48 (253.28; 271.68)                                      | 0.59 (-12.48; 13.66)                                                  |
| 80th                                                                                                                                                | 345.43 (343.24; 347.63)                                      | 0 (-3.12; 3.12)                                                       |
| 90th                                                                                                                                                | 365 (365.00; 365.00)                                         | 0 (0; 0) <sup>c</sup>                                                 |

<sup>a</sup> Adjusted for: MSD, age, wage, gender, occupation, prior claims, firm size, industry sector, claim year, use of opioids, NSAIDS and SMRs within 30 days post claim.

<sup>b</sup> *Adjusted prediction of cumulative time-loss days when all other variables are set at the sample means.*

<sup>c</sup> *Zero value caused by censoring of the data at 365 days.*

Appendix 8. A graphical representation of the results of the main analyses (quantile regression)

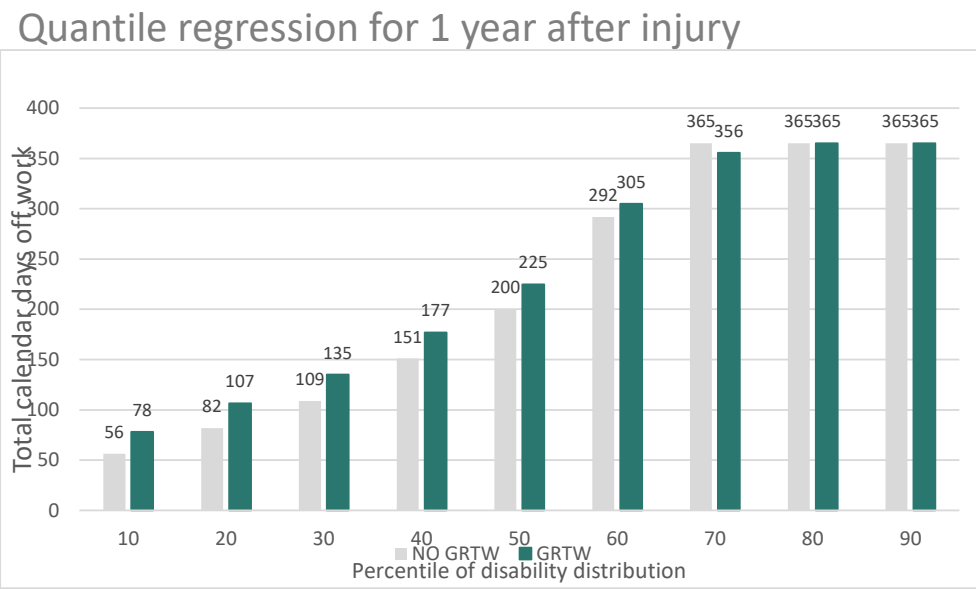

Between the 10<sup>th</sup> and the 50<sup>th</sup> percentile of the disability distribution, workers with GRTW had on average 24 more work disability days until sustainable RTW compared to workers without GRTW. By the 70<sup>th</sup> percentile of the distribution, however, workers with GRTW had fewer disability days than workers without GRTW. There was no difference in time-loss days until sustainable RTW between workers with and without GRTW at the 80<sup>th</sup> and 90<sup>th</sup> percentile.

## Return to work or stay in GRTW within 1 year after injury

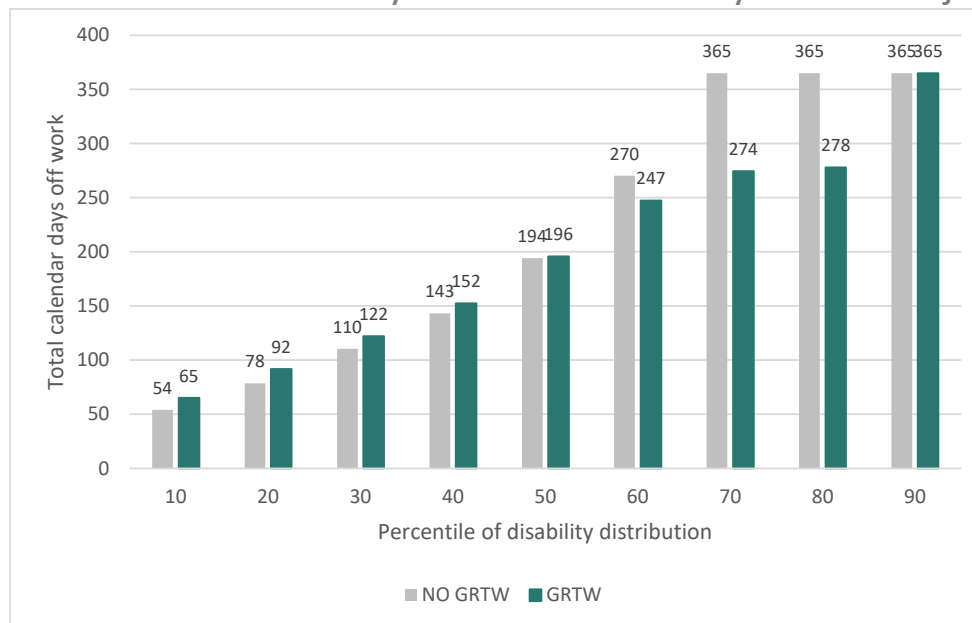

Results for the effect of GRTW were stronger when sustainable GRTW was included in the outcome along with sustainable RTW. Between the 10<sup>th</sup> and 50<sup>th</sup> percentile of the distribution, workers with GRTW had on average 10 more disability days than workers without GRTW. However, workers with GRTW had fewer disability days at the 60<sup>th</sup> percentile 70<sup>th</sup>, and the 80<sup>th</sup> percentile. No differences in disability duration were found at the 90<sup>th</sup> percentile due to the censoring effect at 365 days.
